# Supplementary figures and images for: Hypercontractile Cardiac Phenotype in Mice with Migraine-Associated Mutation in the Na+,K+-ATPase α2-Isoform
Source: MDPI journal article supplement (doi:10.3390/cells12081108), 2023-04-07

**a**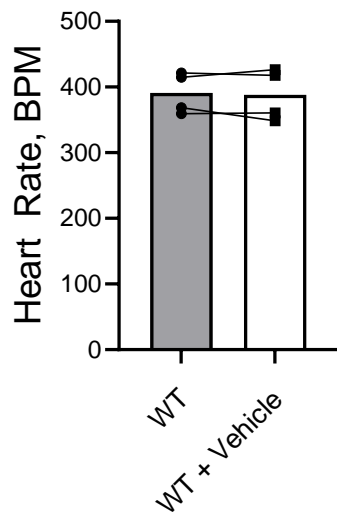**b**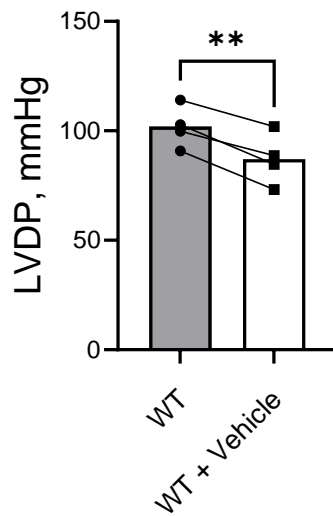**c**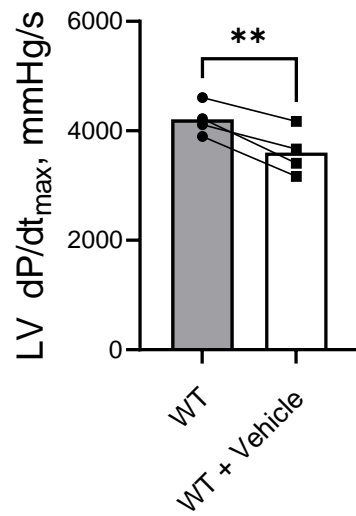**d**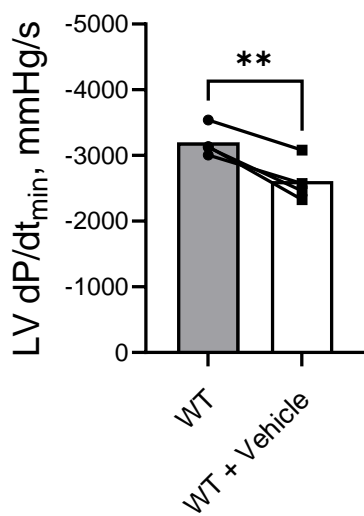**e**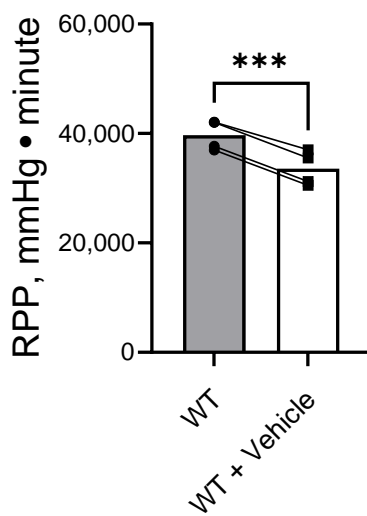**f**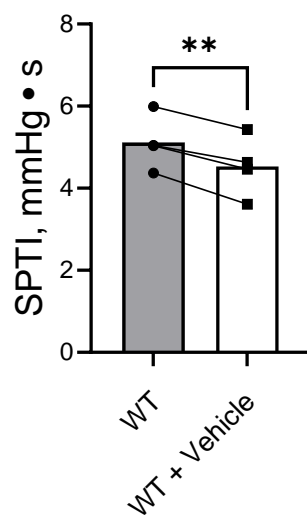**g**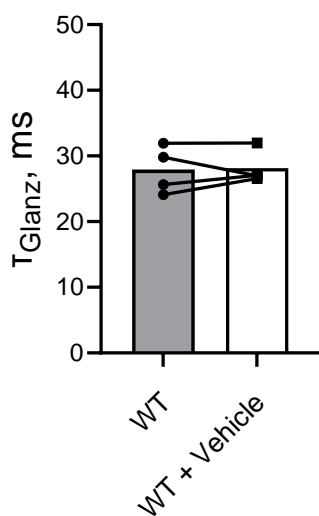**h**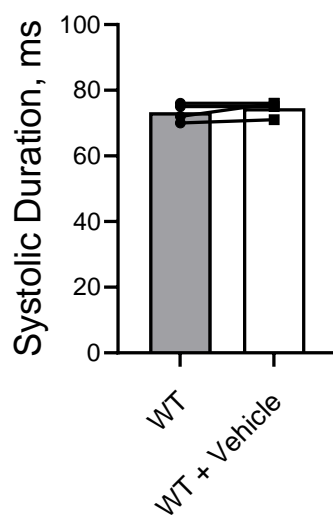

Supplement: s1 [file s1]

**a**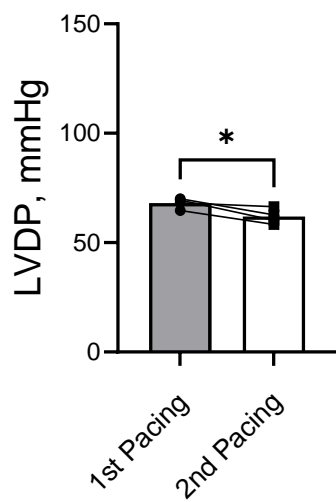**b**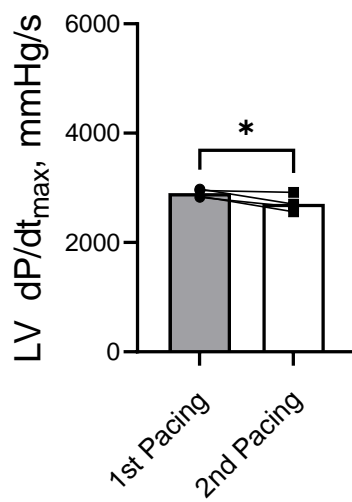**c**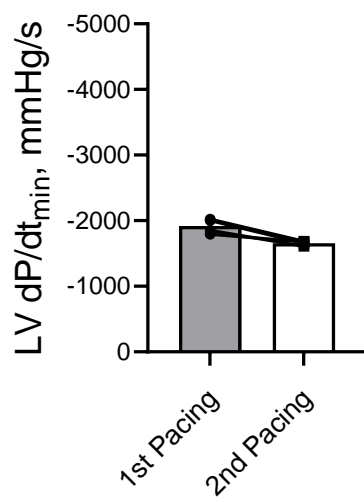**d**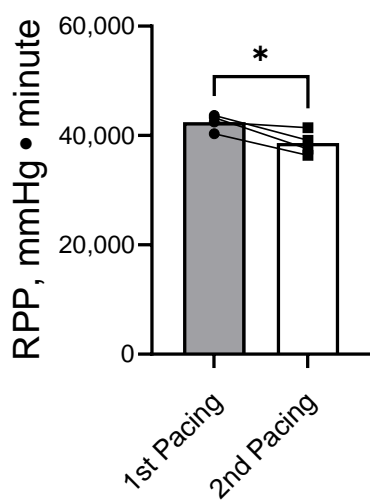**e**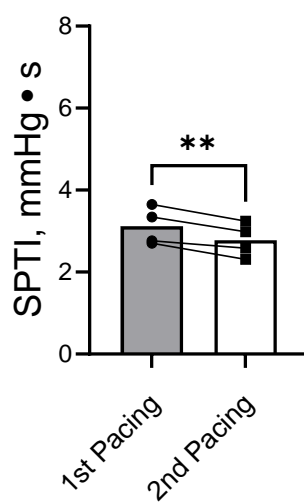**f**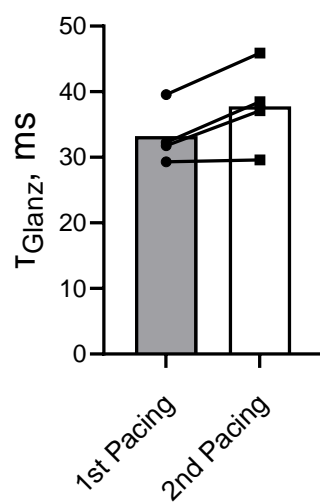**g**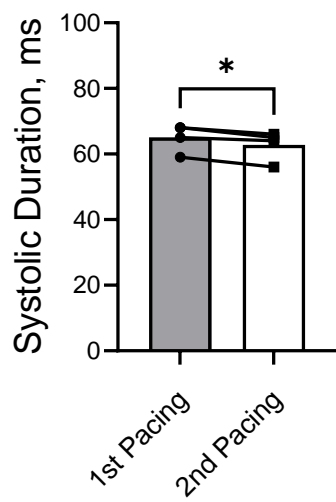

Supplement: s1 [file s1]
